# Supplementary material for: Molecular Mechanism of Mouse Uterine Smooth Muscle Regulation on Embryo Implantation
Source: MDPI journal article supplement (doi:10.3390/ijms232012494), 2022-10-18
Supplement: s1 [file s1]

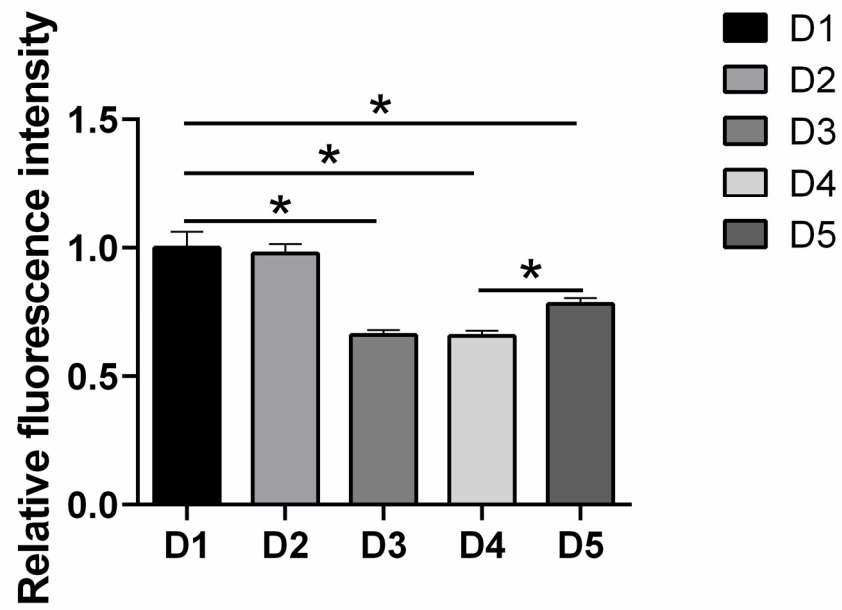

**Figure S1.** Quantification of the phalloidin staining in mouse uteri during the early pregnancy. Bars represent mean  $\pm$  SD (\*p-value < 0.05).
